# Supplementary material
Source: PubMed Central journal article supplement (PMC7347439)
Supplement: NIHMS1586791-supplement-2.pdf [file NIHMS1586791-supplement-2.pdf]

# Table S1. Sequences of Meganucleases in this Study

(with Formal and Abbreviated Construct Names; related to all Figures and Tables)

## I-SmaMI

SKGENSKLNPWAVVGFIDAEGSFMVRVRKNSKYKTGWLVVAIFSVTVDDKDLFLLLESKTTFFGGLGSIKKSNGNSTFSYRIESSEQLTKIILP  
FFDKYSLITEKLDGYLLFKVLELMGTKEHLTQRGLEKIVSLKASINKGLSEELQAAFPQCVPTPRPEINNKLIPDPFWLAGFVSGDGSFKSI  
LKKSESIVKVFQSIQVITQHARDVKLMESLISYLGCGFIEKDSRGPWLYYTVTNFSDIQGKIIPFFHQYKIIGSKYGDYMDWCKIALIMQN  
KNHLTPEGLNEIRALKGGMKNKGR

## I-SmaMI-e-hGATA (eSmaGATA)

SKGENSKLNPWAVVGFIDAEGSFMVRVRKSDMKTGWLVTAIFSVGVDDKDLFLLLESKTTFFGGLGSIKKSAGNSVFLYRISSEQLTKIIL  
PFFDKYSLITEKLDGYLLFKVLELMGTKEHLTQRGLEKIVSLKASINKGLSEELQAAFPQCVPTPRPEINNKNIPDPFWLAGFVSGDGSFKSI  
SYLTKAEWSKVGFSHLEFQITQHARDVKLMESLISYLGCGYISKDSRGPWLYYRVTRFSDIQGKIIPFFHQYKIIGSKYGDYNDWCKIALI  
MQNKNHLTPEGLNEIRALKGGMKNKGR

## I-Onul

SRRESINPWILTFADAEGSFLLRIRNNKSSVGYSTELGFQITLHNKDKSILENIQSTWVGVIANSNGDNAVSLKVTRFEDLKVIIDHFEKY  
PLITQKLDGYMLFKQAFVCMENKEHLKINGIKELVRIKAKLNWGLTDELKKAFFPEIISKERSLINKNIPNFKWLAGFTSGEGCFFVNLKSKS  
KLGQVQVQLVFSITQHIDKDNLMNSLITYLGCGYIKEKNKSEFSWLDVVTKFSDIRDKIIPFFQYTLIGTKLDFEDWCKVAKLIEEKKHLT  
ESGLDEIKKIKLNMNKG

## I-Onul-e-Therm (eOnuTherm)

SRRESINPWILTFADAEGSFLLRIRKNNKSSVGYSTELGFQITLHNKDKSILENIQSTWVGVIANSNGDNAVSLKVTRFEDLKVIIDHFEKY  
PLITQKYADYMLFKQAFVCMENKEHLTIEGKELVRIKAKLNWGLTDELKKAFFPEIISKERSLINKNIPNFKWLAGFTSGEGCFFVNLKSKS  
KLGQVQVQLVFSITQHIRDKNLMNSLITYLGCGYIKKKNKSEFSWLDVVTKFSDIRDKIIPFFQYTLIGTKLDFEDWCKVAKLIEEKKHLT  
EGLDEIKKIKLNMNKG

## I-Onul-e-ThermE178D (eOnuTherm-E178D)

SRRESINPWILTFADAEGSFLLRIRKNNKSSVGYSTELGFQITLHNKDKSILENIQSTWVGVIANSNGDNAVSLKVTRFEDLKVIIDHFEKY  
PLITQKYADYMLFKQAFVCMENKEHLTIEGKELVRIKAKLNWGLTDELKKAFFPEIISKERSLINKNIPNFKWLAGFTSGEGCFFVNLKSKS  
KLGQVQVQLVFSITQHIRDKNLMNSLITYLGCGYIKKKNKSEFSWLDVVTKFSDIRDKIIPFFQYTLIGTKLDFEDWCKVAKLIEEKKHLT  
EGLDEIKKIKLNMNKG

## I-Onul-e-Therm-bCtxA (eOnuTherm-bCtxA)

SINPWILTFADAEGSFLLRIRKNNKSSVGYSTELGFQITLHNKDKSILENIQSTWVGVIANSNGDNAVRLRVTRFEDLKVIIDHFEKYPLIT  
QKYADYMLFKQAFVCMENKEHLTIEGKELVRIKAKLNWGLTDELKKAFFPEIISKERSLINKNIPNFKWLAGFTSGEGCFFVNLKSKSKLG  
VQVCLVFSIQHIRDKNLMNSLITYLGCGYILKKNKSEFSWLEFCVTKFSDIRDKIIPFFQYTLIGTKLDFEDWCKVAKLIEEKKHLTEGL  
DEIKKIKLNMNKG

## I-Onul-e-CtxA (wildtype I-Onul scaffold with 13 specificity-altering mutations from eOnuTherm-bCtxA)

SINPWILTFADAEGSFLLRIRNRNKSSVGYSTELGFQITLHNKDKSILENIQSTWVGVIANSNGDNAVRLRVTRFEDLKVIIDHFEKYPLIT  
QKLDGYMLFKQAFVCMENKEHLKINGIKELVRIKAKLNWGLTDELKKAFFPEIISKERSLINKNIPNFKWLAGFTSGEGCFFVNLKSKSKLG  
VQVCLVFSIQHIRDKNLMNSLITYLGCGYILEKNKSEFSWLEFCVTKFSDINDKIIPVFQENTLIGVKLEDFEDWCKVAKLIEEKKHLTESG  
LDEIKKIKLNMNKG

## I-Onul-Lib07 (last active intermediate prior to failed engineering towards the bCtxA target on the wildtype I-Onul scaffold)

SINPWILTFADAEGSFLLRIRNNKSSVGYSTELGFQISLHNKDKSILENIQSTWVGVIANSNGDNAVSLKVTRFEDLKVIIDHFEKYPLIT  
QKLDGYMLFKQAFVCMENKEHLKINGIKELVRIKAKLNWGLTDELKKAFFPEIISKERSLINKNIPNFKWLAGFTSGEGNLFVRLIKSKSKLG  
VQVQVLFVFAIQHIRDKNLMNSLITYLGCGYILEKNKSEFSWLEFCVTKFSDINDKIIPVFQENTLIGVKLEDFEDWCKVAKLIEEKKHLTESG  
LDEIKKIKLNMNKG

## I-Onul-e-Therm-hChr11v1 (eOnuTherm-hChr11v1) (Intermediate #1)

SINPWILTFADAEGSFLLRIRKNNKSSVGYSTELGFQITLHNKDKSILENIQSTWVGVIANSNGDNAVSLKVTRFEDLKVIIDHFEKYPLITQ  
KYADYMLFKQAFVCMENKEHLTIEGKELVRIKAKLNWGLTDELKKAFFPEIISKERSLINKNIPNFKWLAGFTSGEGCFFVNLKSKSKLG  
VQVCLVFSISQHIRDKNLMNSLITYLGCGYIKKKNKSEFSWLEFCVTKFSDIRDKIIPFFQYTLIGTKLDFEDWCKVAKLIEEKKHLTEGLD  
EIKKIKLNMNKG

## I-Onul-e-Therm-hChr11v2 (eOnuTherm-hChr11v2) (Intermediate #2)

SINPWILTFADAEGSFLLRIRKNNKSSVGYSTELGFQITLHNKDKSILENIQSTWVGVIANSNGDNAVSLKVTRFEDLKVIIDHFEKYPLITQ  
KYADYMLFKQAFVCMENKEHLTIEGKELVRIKAKLNWGLTDELKKAFFPEIISKERSLINKNIPNFKWLAGFTSGEGCFFVNLKSKKTKLGV  
VQVCLVFSISQHIRDKNLMNSLITYLGCGYIKKKNKSEFSWLEFCVTKFSDIRDKIIPFFQYTLIGTKLDFEDWCKVAKLIEEKKHLTEGLD  
EIKKIKLNMNKG

## I-Onul-e-Therm-hChr11v3 (eOnuTherm-hChr11v3) Final engineered enzyme

SINPWILTFADAEGSFLLRIRKYSQTRVGYLTELGFQITLHNKDKSILENIQSTWVGVIANSNGDNAVSLKVTRFEDLKVIIDHFEKYPLITQ  
KYADYMLFKQAFVCMENKEHLTIEGKELVRIKAKLNWGLTDELKKAFFPEIISKERSLINKNIPNFKWLAGFTSGEGCFFVNLKSKKTKLGV  
VQVCLVFSISQHIRDKNLMNSLITYLGCGYIKKKNKSEFSWLEFCVTKFSDIRDKIIPFFQYTLIGTKLDFEDWCKVAKLIEEKKHLTEGLD  
EIKKIKLNMNKG

## Table S2: Sequences of Oligonucleotides in this Study

Listed in a 5'→3' orientation, all oligonucleotides ordered from Integrated DNA Technologies (IDT); related to STAR Methods.

### Labeled Double-stranded Target Site Substrates

**A647 Target Site Substrate Primer** 5' (5A<sub>lex</sub>647N) – TGGACACGACTTGAGC 3'  
**Biotin Target Site Substrate Primer** 5' (5B<sub>iosg</sub>) – TCAGCACAGCACTACG 3'  
**Sample Target Site Substrate Template** 5' TGGACACGACTTGAGC**TTTCCACTTATTCAACCTTTT**ACGTAGTGCTGTGCTGA 3'  
(22bp meganuclease target site for I-OnuI shown in blue text)

### Sample Ultramers for Generating Engineering Library Inserts

DNA-contacting positions are highlighted to indicate potential places for incorporation of degenerate codons

#### **Wild type I-OnuI Ultramer A**

GGTTTCGCTGACGCTGAGGGT**TCTTTCCTGCTGAGAATCAGAAACAACAACAGTCTTCTGTCGGT**TAT**TCTACTGAACTGGGT**TTCCAGAT**ACCCTGCACAACAAGGACAAGTCCATCCTG**

#### **Wild type I-OnuI Ultramer B**

CATCCAGTCCACTTGAAGGTCGGT**GTCATCGCTAAC**TCTGGTGAC**AACGCTGTC**TCTCTGAAGGTC**ACCAGATTCGAGGACCTGAAGGTCATCATCGAC**

#### **Wild type I-OnuI Ultramer C**

GCTGGTTTCACTAGTGGTGAGGGT**TGTTTC****TTCGTC****AACCTGATCAAG****TCCAAGTCCAAGCTGGGT**GTC**CAGGTC****CAGCTGGTC**TTCT**TCTATCACT**CAGCACATCAAGGACAAGAACCTGATGA

#### **Wild type I-OnuI Ultramer D**

CTCTGATCACTTATCTGGGTTGCGGT**TATATCAAGGAGAAGAAC****AAGTCCGAGTTC**TCC**TGGCTGGAC**TTC**GTCGTC****ACC**AAGTTCTCCGACATTAACGACAAGATCATCCAGTCTTCCAGGAA

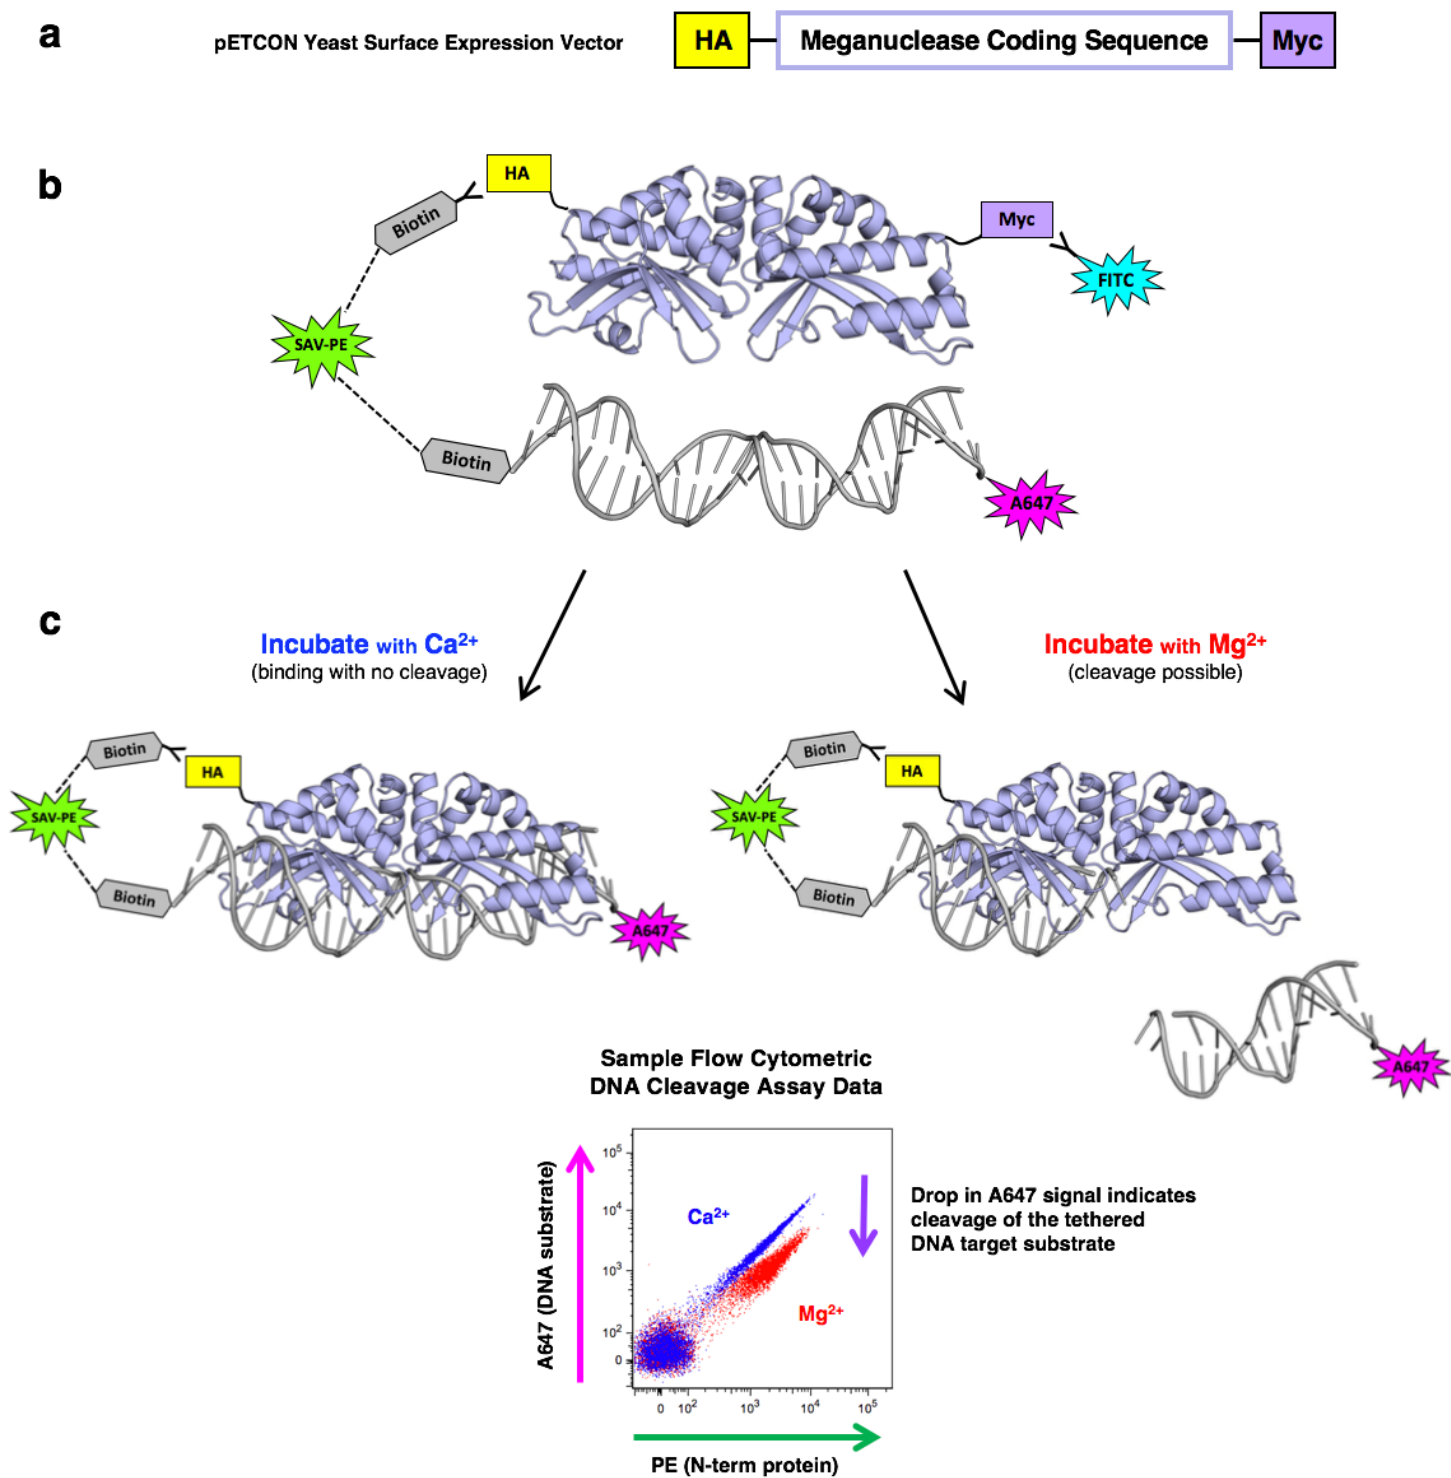

**Supplementary Figure S1; related to STAR Methods. Schematic of the tethered flow cytometric DNA cleavage activity assay.** (a) The pETCON vector expresses the meganuclease of interest on the surface of yeast with an N-terminal HA epitope tag and a C-terminal Myc epitope tag. (b) Three different fluorescent colors are utilized in this flow cytometric assay: 1.) FITC: The Myc tag is stained with an anti-Myc-FITC antibody to detect full-length expression of the protein. 2.) PE: The HA tag is stained with a biotinylated anti-HA antibody which is then conjugated to a fluorescent streptavidin (SAV-PE) molecule to detect the N-terminus of the protein. 3.) A647: The anti-HA-biotin-SAV-PE bridge can also be used to create a physical tethering of an A647-labeled double-stranded DNA substrate to the N-terminus of the protein. (c) Cleavage activity of the surface-expressed meganuclease is assessed by comparing A647 signal after incubation at 37°C in the presence of  $\text{Ca}^{2+}$  (blue cell population, enzyme can bind the DNA substrate but not cleave it) or  $\text{Mg}^{2+}$  (red cell population, binding and cleavage of the DNA substrate may occur). When the tethered DNA substrate is successfully cleaved, the A647 tag is released from the DNA and washed away. Therefore, a drop in the A647 signal indicates cleavage of the DNA substrate by the meganuclease. The cleavage shift can be quantitated by calculating a ratio of the median A647 signal for the  $\text{Ca}^{2+}$  sample to the median A647 signal for the  $\text{Mg}^{2+}$  sample.

**a**

```

I-SmaMI      SKGENSKLNPWAVVGFIDAEGSFMVVRVKNKYKTGWLVAIFSVTVDKKDLFLESKTFFGGLGSIKKSNGNSTFSYRI
eSmaGATA     SKGENSKLNPWAVVGFIDAEGSFMVVRVRRKRSDMKTGWLVTAIFSVGVDKKDLFLESKTFFGGLGSIKKANSVFLYRI
*****
I-SmaMI      ESSEQLTKIILPFFDKYSLITEKLGDYLLFKKVLELMGTKEHLTQRGLEKIVSLKASINKGLSEELQAAFPQCVPTPRPE
eSmaGATA     YSSEQLTKIILPFFDKYSLITEKLGDYLLFKKVLELMGTKEHLTQRGLEKIVSLKASINKGLSEELQAAFPQCVPTPRPE
*****
I-SmaMI      INNKLIPDPFWLAGFVSGDGSFKSILKKSSESIKVGFQSILVQITQHARDVKLMESLISYLGCGFIEKDSRGPWLYYTVT
eSmaGATA     INNKNIIPDPFWLAGFVSGDGSFKSYLTKAEWSKVGFQSHLEFQITQHARDVKLMESLISYLGCGYISKDSRGPWLYYRVT
****
I-SmaMI      NFSDIQGKIIPFFHQYKIIIGSKYGDYMDWCKIALIMQKNHLTPEGLNEIRALKGGMKNKGRLL
eSmaGATA     RFSDIQGKIIPFFHQYKIIGSKYGDYNDWCKIALIMQNKNHLTPEGLNEIRALKGGMKNKGRL
*****

```

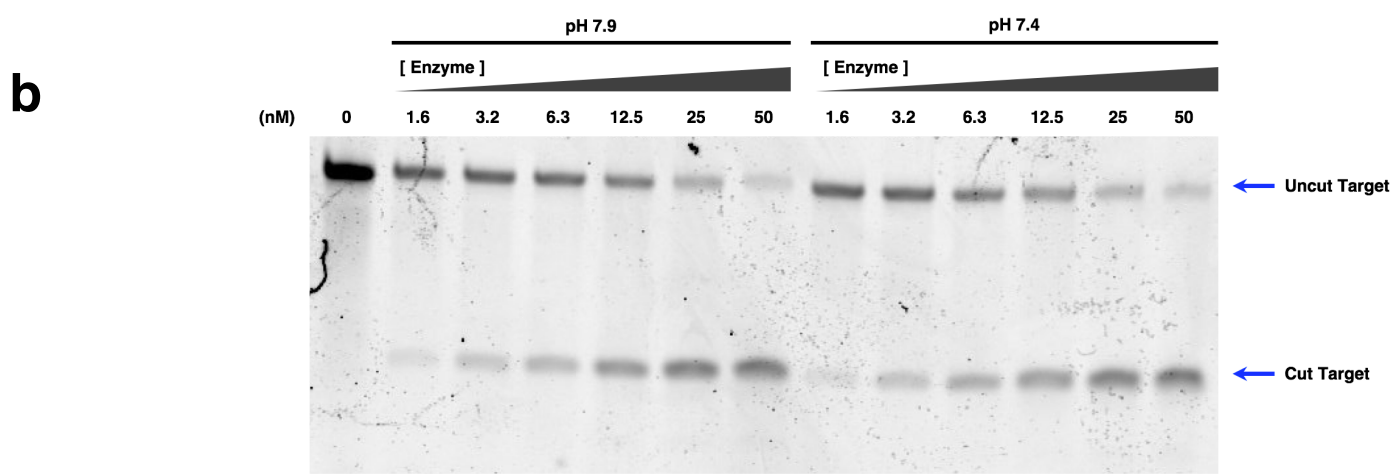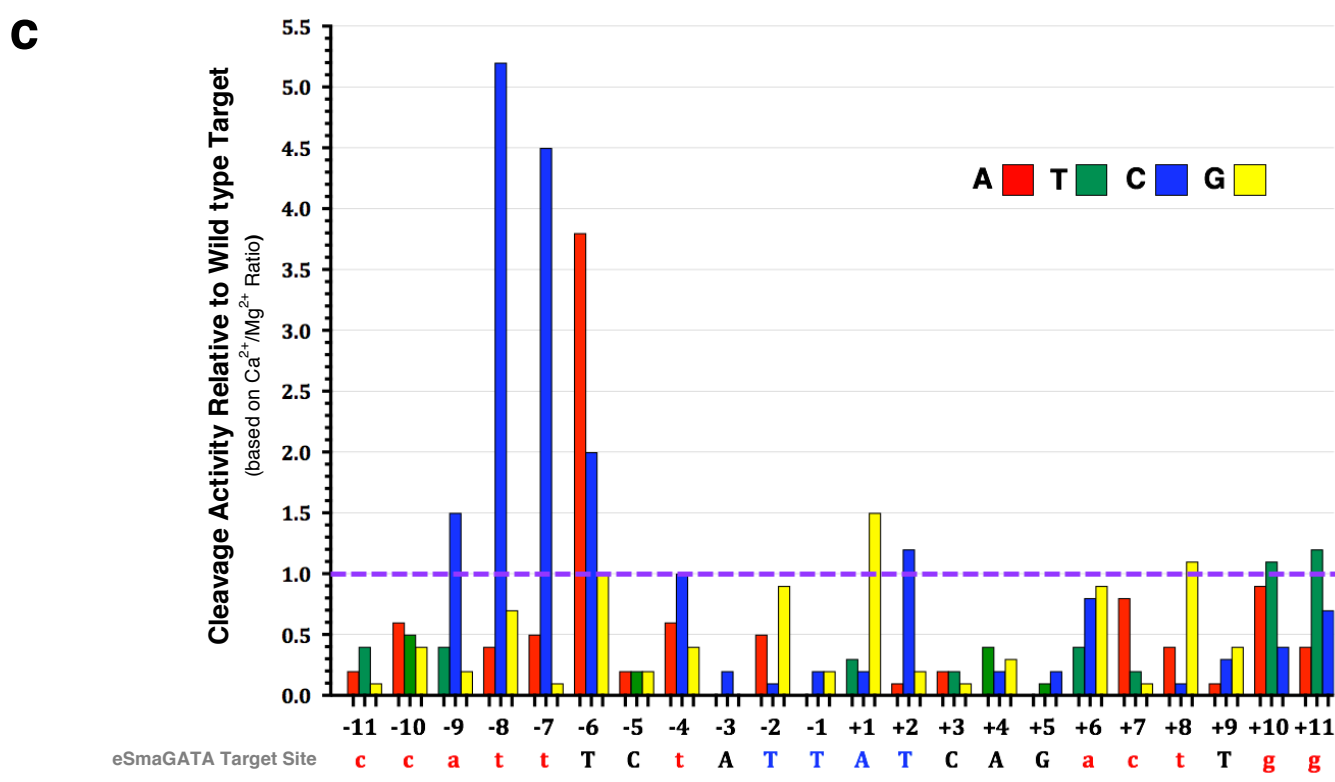

**Supplementary Figure S2; related to Figure 1. Characterization of eSmaGATA** (a) Amino acid sequence alignment of the initial engineering scaffold (I-SmaMI) and the final eSmaGATA meganuclease. (b) DNA cleavage activity of the eSmaGATA meganuclease. Recombinant eSmaGATA meganuclease was purified and tested for cleavage activity using fluorescently labeled double stranded DNA target substrates. Increasing concentration of enzyme was incubated with 40nM DNA target substrate for 20 minutes at 37°C. The assay was performed at both pH 7.9 and pH 7.4. The resulting cleavage products were separated on an acrylamide gel and visualized with a Typhoon imager. (c) DNA cleavage specificity of the final re-engineered eSmaGATA meganuclease. The ability of eSmaGATA to cleave 66 'miscognate' DNA target sites (each harboring a single base pair substitution at one of the 22 positions in the target sequence) was measured with the tethered flow cytometric cleavage assay. Activity against each target site is illustrated as a bar graph showing the Ca<sup>2+</sup>/Mg<sup>2+</sup> ratio (magnitude of the drop in A647 signal from the cleaved DNA target substrate) relative to activity against the cognate target site. Activity of the enzyme against the cognate target site is indicated with a horizontal purple line.

**a**

```

wt  SRRESINPWILTFADAEGSFLLRIRNNKSSVGYSTELGFQITLHNKDKSILENIQSTWKGVIANSAGDNAVSLKVTRFEDLKVIIDHF
P1  SRRESINPWILTFADAEGSFLLRIRKNNKSSVGYSTELGFQITLHNKDKSILENIQSTWKGVIANSAGDNAVSLKVTRFEDLKVIIDHF
P3  SRRESINPWILTFADAEGSFLLRIRKNNKSSVGYSTELGFQITLHNKDKSILENIQSTWKGVIANSAGDNAVSLKVTRFEDLKVIIDHF
P4  SRRESINPWILTFADAEGSFLLRIRKNNKSSVGYSTELGFQITLHNKDKSILENIQSTWGVGVIANSGDNAVSLKVTRFEDLKVIIDHF
P5  SRRESINPWILTFADAEGSFLLRIRKNNKSSVGYSTELGFQITLHNKDKSILENIQSTWGVGVIANSGDNAVSLKVTRFEDLKVIIDHF
P6  SRRESINPWILTFADAEGSFLLRIRKNNKSSVGYSTELGFQITLHNKDKSILENIQSTWGVGVIANSGDNAVSLKVTRFEDLKVIIDHF
P7  SRRESINPWILTFADAEGSFLLRIRKNSSSVGYSTELGFQITLHNKDKSILENIQSTWGVGVIANSGDNAVSLKVTRFEDLKVIIDHF
*****.*.*****.*****.*****.*****.*****.*****.*****.*****.*****.*****.*****.*****.*****.*****

wt  EKYPPLITQKLGDMYLFKQAFVCMENKEHLKINGIKELVRIKAKLNWGLTDELKKAFFPEIISKERSLINKNIPNFKWLAFGFTSGEGCFFVN
P1  EKYPPLITQKLGDMYLFKQAFVCMENKEHLTIEGKELVRIKAKLNWGLTDELKKAFFPEIISKERSLINKNIPNFKWLAFGFTSGEGCFFVN
P3  EKYPPLITQKYADYMLFKQAFNVCMENKEHLTIEGKELVRIKAKLNWGLTDELKKAFFPEIISKERSLINKNIPNFKWLAFGFTSGEGCFFVN
P4  EKYPPLITQKYADYMLFKQAFNVCMENKEHLTIEGKELVRIKAKLNWGLTDELKKAFFPEIISKERSLINKNIPNFKWLAFGFTSGEGCFFVN
P5  EKYPPLITQKYADYMLFKQAFNVCMENKEHLTIEGKELVRIKSLNWGLTDELKKAFFPEIISKERSLINKNIPNFKWLAFGFTSGEGCFFVN
P6  EKYPPLITQKYADYMLFKQAFNVCMENKEHLTIEGKELVRIKSLNWGLTDELKKAFFPEIISKERSLINKNIPNFKWLAFGFTSGEGCFFVN
P7  EKYPPLITQKYADYMLFKQAFNVCMENKEHLTIEGKELVRIKSLNWGLTDELKKAFFPEIISKERSLINKNIPNFKWLAFGFTSGEGCFFVN
*****.*****.*****.*.*****.*****.*****.*****.*****.*****.*****.*****.*****.*****.*****.*****

wt  LIKSKSKLGVQVQLVFSITQHIKDKNLMNSLITYLGCGYIKEKNKSEFSWLDVVTKFSIDINDKIIPVFQENTLIGVKLEDFEDWCKVAK
P1  LIKSKSKLGVQVQLVFSITQHIKDKNLMNSLITYLGCGYIKEKNKSEFSWLDVVTKFSIDRDKIIPFFQEYTLIGTKLKDFEDWCKVAK
P3  LIKSKSKLGVQVQLVFSITQHIRDKNLMNSLITYLGCGYIKKKNKSEFSWLDVVTKFSIDRDKIIPFFQEYTLIGTKLKDFEDWCKVAK
P4  LIKSKSKLGVQVQLVFSITQHIRDKNLMNSLITYLGCGYIKKKNKSEFSWLDVVTKFSIDRDKIIPFFQEYTLIGTKLKDFEDWCKVAK
P5  LIKSKSKLGVQVQLVFSITQHIRDKNLMNSLEYLGCGYIKKKNKSEFSWLDVVTKFSIDRDKIIPFFQEYTLIGTKLKDFLDWCKVAK
P6  LIKSKSKLGVQVQLVFSITQHIRDKNLMNSLEYLGCGYIKKKNKSEFSWLDYVVTKFSIDRDKIIPFFQEYTLIGTKLKDFLDWCKVAK
P7  LIKSKSKLGVQVQLVFSITQHIRDKNLMNSLEYLGCGYIKKKNKSFSWLDYVVTKFSIDRDKIIPFFQKYTLIGTKLKDFLDWCKVAE
*****.*****.*****.*****.*****.*****.*****.*****.*****.*****.*****.*****.*****.*****.*****

wt  LIEEKKHLTESGLDEIKKIKLNMNKG RVF
P1  LIEEKKHLTEEGLDEIKKIKLNMNKG RVF 9 mutations
P3  LIEEKKHLTEEGLDEIKKIKLNMNKG RVF 14 mutations
P4  LIEEKKHLTEEGLDEIKKIKLNMNKG RVF 15 mutations
P5  LIENKKHLTEEGLDEIKKIKLNMNKG RVF 19 mutations
P6  LIENKKHLTEEGLDKIKKIKLNMNKG RVF 22 mutations
P7  LIENKKHLTEEGLDKIKKIKLNMNKG RVF 26 mutations
*****.*****.*****.*****.*****.*****.*****.*****.*****.*****.*****.*****.*****.*****.*****

```

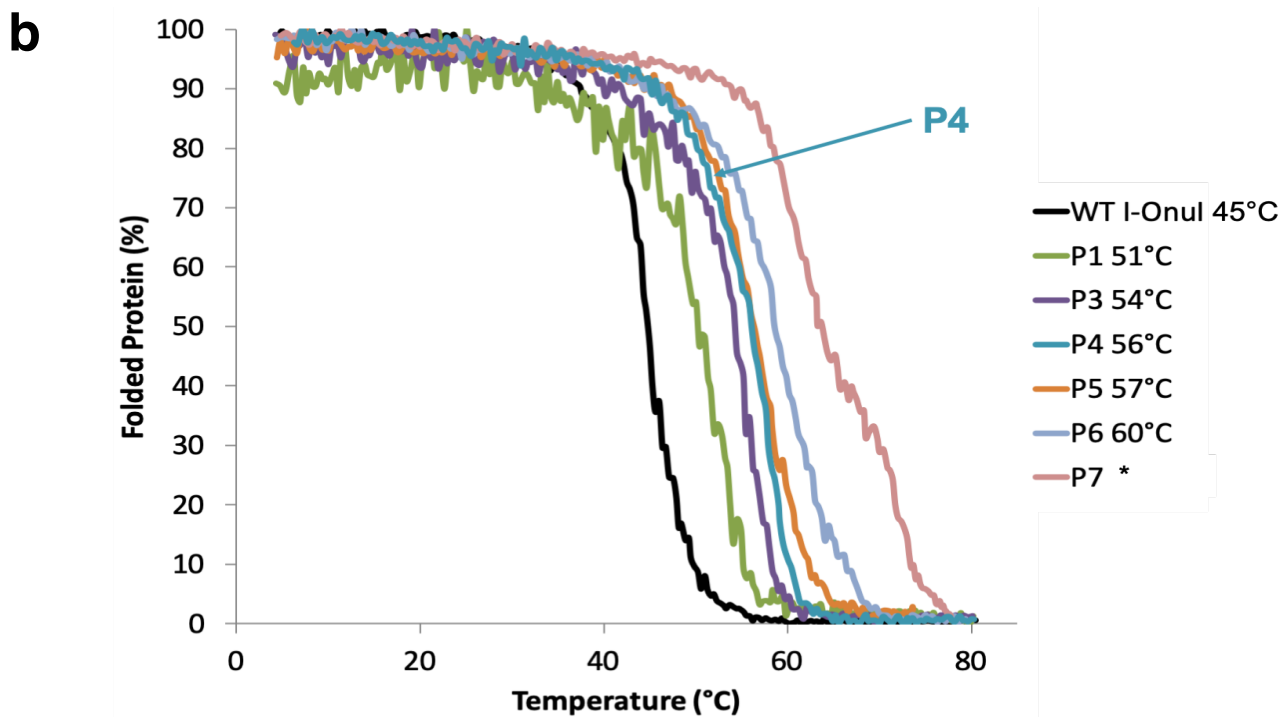

**Supplementary Figure S3; related to Figure 2. Structure-based design variants of the I-Onul meganuclease tested for improved thermal stability.** (a) A series of 6 constructs with increasing numbers of suggested point mutations (generated by the PROSS server) were synthesized and individually expressed and purified. (P2 was removed because it was redundant with P1.) (b) Examination of the thermal stability of each construct using thermal denaturation analyses via circular dichroism (CD) spectroscopy indicated thermal denaturation midpoints ranging from 45° C (the wild-type enzyme) to 60°C or higher ('P6', containing 22 point mutations and 'P7', containing 26 point mutations; the P7 construct displays a somewhat biphasic denaturation transition that makes the estimation of the T<sub>m</sub> value less accurate). In addition to the extent of T<sub>m</sub> increases displayed by the various constructs, the overall cooperativity of protein unfolding varied slightly. We eventually selected construct 'P4' (harboring 15 amino acid substitutions and displaying highly cooperative unfolding behavior with a T<sub>m</sub> value of 56°) for use as a thermostabilized scaffold for engineering and for comparative analyses vs. engineering with the wild-type I-Onul scaffold. 'P4' is eOnuTherm in this manuscript.

**a**

```

eOnuTherm      SINPWILTFADAEGSFLLRIRKNNKSSVGYSTELGFQITLHNKDKSILENIQSTWGVGVIANSGDNAVSLKVTRFEDLK
eOnuTherm-bCtxA SINPWILTFADAEGSFGLRIRKRNKSSVGYSTELGFELIKLHNKDKSILENIQSTWGVGVIANSGSNAVRLRVTRFEDLK
*****          *****

eOnuTherm      VIIDHFEKYPLITQKYADYMLFKQAFNVNENKEHLTIEGKELVRIKAKLNWGLTDELKKAFFPEIISKERSLINKNIPNF
eOnuTherm-bCtxA VIIDHFEKYPLITQKYADYMLFKQAFNVNENKEHLTIEGKELVRIKAKLNWGLTDELKKAFFPEIISKERSLINKNIPNF
*****

eOnuTherm      KWLAFGFTSGEGCFVNLIKSKSLGVQVQVLFVFSITQHIRDKNLMNSLITYLGCYIKKKNKSEFSWLDVFTKFSDIRDK
eOnuTherm-bCtxA KWLAFGFTSGEGCFVNLTKSKSLGVQVCLVFSIQGHIRDKNLMNSLITYLGCYITKKNKSEFSWLEFCVTKFSDIRDK
*****

eOnuTherm      IIPPFQEYTLIGTKLKFEDWCKVAKLIEEKHKLTEEGLDEIKKIKLNMNKGR
eOnuTherm-bCtxA IIPPFQEYTLIGTKLKFEDWCKVAKLIEEKHKLTEEGLDEIKKIKLNMNKGR
*****

```

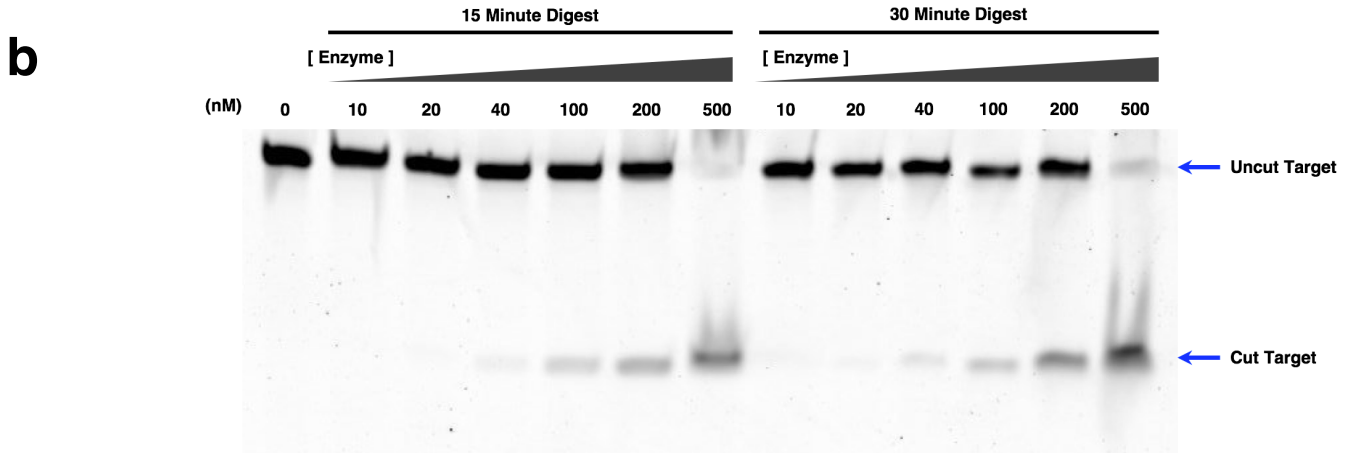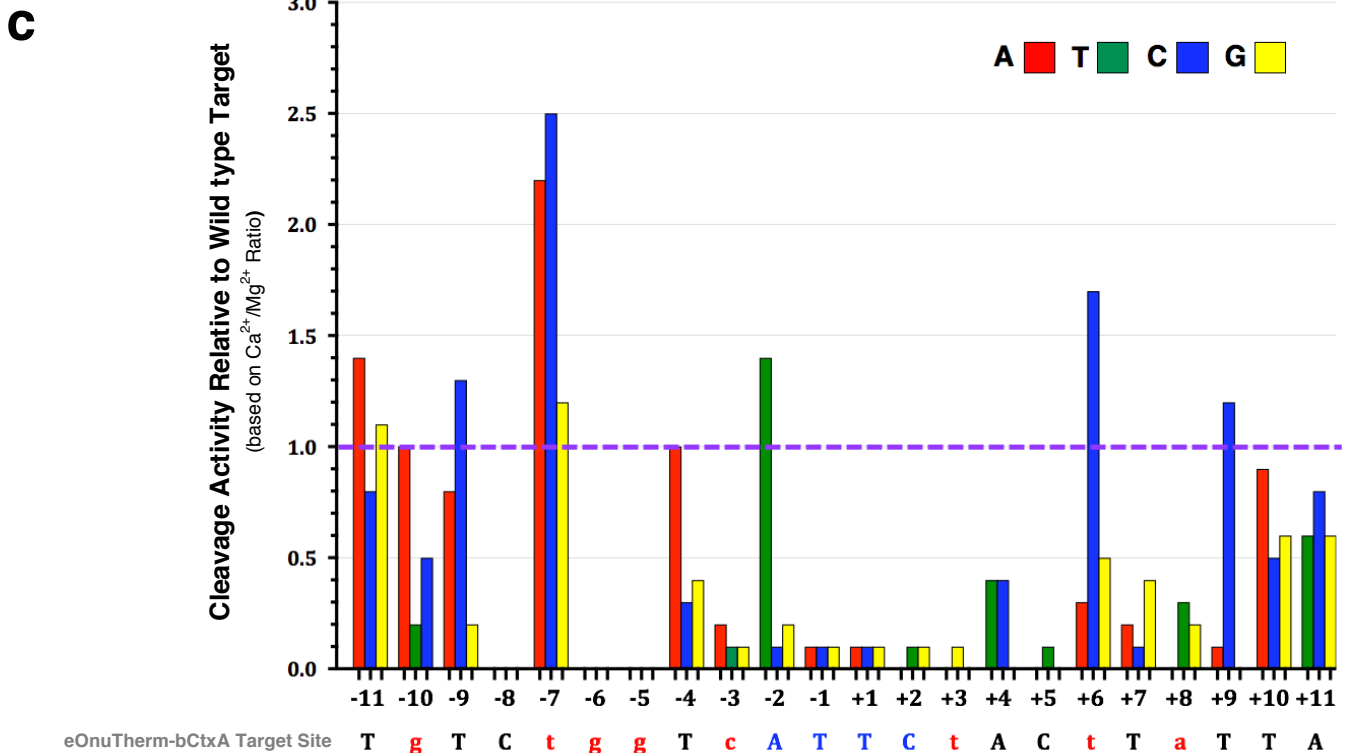

**Supplementary Figure S4; related to Figure 3. Characterization of eOnuTherm-bCtxA** (a) Amino acid sequence alignment of the initial engineering scaffold (eOnuTherm) and the final engineered eOnuTherm-bCtxA meganuclease. (b) DNA cleavage activity of the eOnuTherm-bCtxA meganuclease. Recombinant eOnuTherm-bCtxA meganuclease was purified and tested for cleavage activity using fluorescently labeled double-stranded DNA target substrates. Increasing concentration of enzyme was incubated with 40nM DNA target substrate at pH 7.9 and a temperature of 37°C. The digest was allowed to run for 15 minutes or 30 minutes. The resulting cleavage products were separated on an acrylamide gel and visualized using a Typhoon imager. (c) DNA cleavage specificity of the final re-engineered eOnuTherm-bCtxA meganuclease. The ability of eOnuTherm-bCtxA to cleave 66 'miscognate' DNA target sites (each harboring a single base pair substitution at one of the 22 positions in the target sequence) was measured with the tethered flow cytometric cleavage assay. Activity against each target site is illustrated as a bar graph showing the  $Ca^{2+}/Mg^{2+}$  ratio (magnitude of the drop in A647 signal from the cleaved DNA target substrate) relative to activity against the cognate target site. Activity of the enzyme against the cognate target site is indicated with a horizontal purple line.

**a**

```

eOnuTherm      SINPWILTGFADEAGSFLLRIRKNNKSSVGYSTELGFQITLHNKDKSILENIQSTWGVGVIANSGDNAVSLKVTRFEDLK
eOnuTherm-hChr11v3 SINPWILTGFADEAGSFLLRIRKYSQTRVGYTELGFQITLHNKDKSILENIQSTWGVGVIANSGDNAVSLKVTRFEDLK
*****          .: : * * * *****

eOnuTherm      VIIDHFEKYPLITQKYADYMLFKQAFNVNMEKHELTIEGIKELVRIKAKLNWGLTDELKKAFFPEIISKERSLINKNIPNF
eOnuTherm-hChr11v3 VIIDHFEKYPLITQKYADYMLFKQAFNVNMEKHELTIEGIKELVRIKAKLNWGLTDELKKAFFPEIISKERSLINKNIPNF
*****

eOnuTherm      KWLAGFTSGEGCFFVNLIKSKSLKLVQVQVLFVFSITQHIRDKNLMNSLITYLGCYIKKKNKSEFSWLDVFTKFSDIRDK
eOnuTherm-hChr11v3 KWLAGFTSGDGCFFVNLSKKRTKLGVQVKLVFSISQHIRDKNLMNSLITYLGCYIKKKNKSEFSWLEFVVTKFSDIRDK
*****:***** *.:*****:*****:*****:*****:*****:*****:*****:*****:*****

eOnuTherm      IIPFFQEYTLIGTKLDFEDWCKVAKLIEEKHKLTEEGLDEIKKIKLNMNKGR
eOnuTherm-hChr11v3 IIPFFQEYTLIGTKLDFEDWCKVAKLIEEKHKLTEEGLDEIKKIKLNMNKGR
*****

```

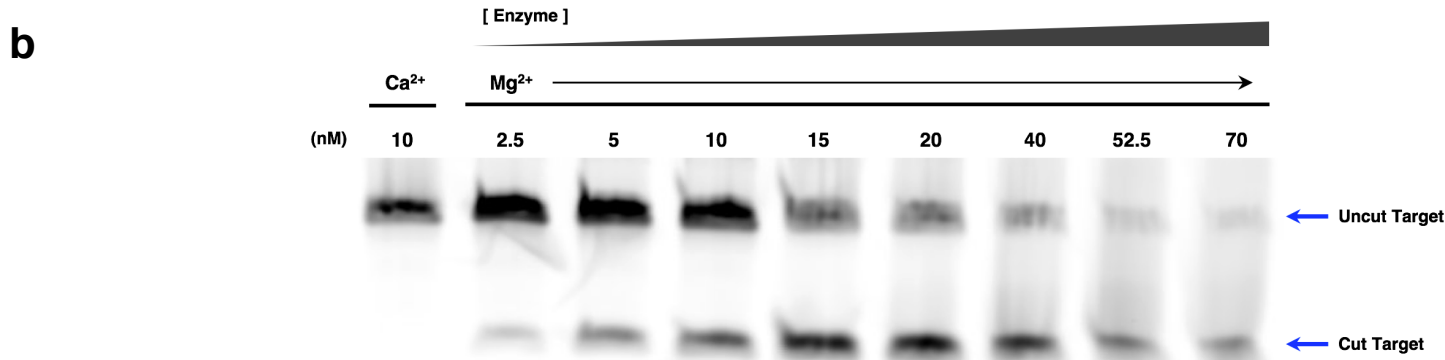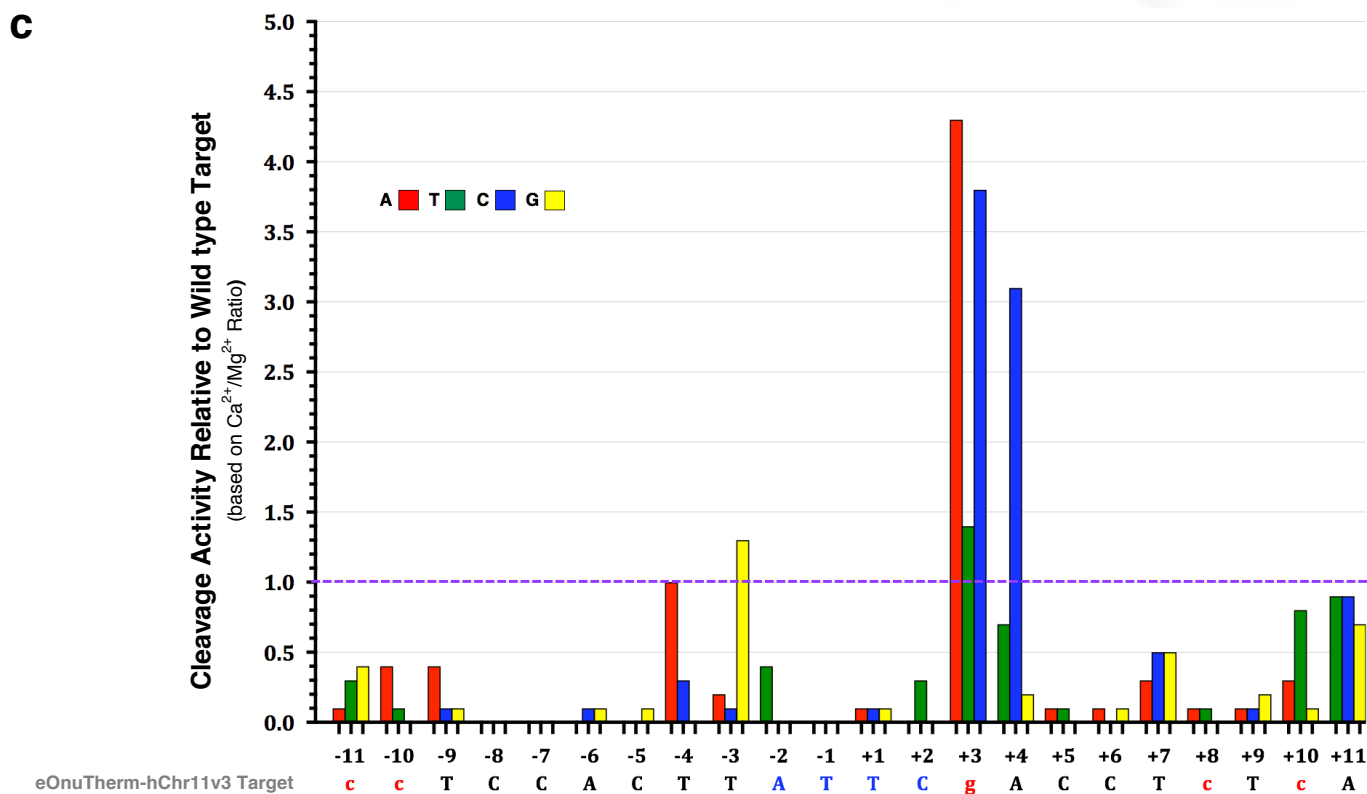

**Supplementary Figure S5; related to Figure 4. Characterization of eOnuTherm-hChr11v3**

(a) Amino acid sequence alignment of the initial engineering scaffold (eOnuTherm) and the final engineered eOnuTherm-hChr11v3 meganuclease. (b) DNA cleavage activity of the eOnuTherm-hChr11v3 meganuclease. Recombinant eOnuTherm-hChr11v3 meganuclease was purified and tested for cleavage activity using fluorescently labeled double-stranded DNA target substrates. Increasing concentration of enzyme was incubated with 40nM DNA target substrate at pH 7.4 and a temperature of 37°C for 30 minutes. A sample with 10nM enzyme and Ca<sup>2+</sup> as the divalent cation was used for a no-cleavage control, while the remaining reactions were performed in the presence of Mg<sup>2+</sup>. The resulting cleavage products were separated on an acrylamide gel and visualized with a Typhoon imager. (c) DNA cleavage specificity of the final engineered eOnuTherm-hChr11v3 meganuclease. The ability of eOnuTherm-hChr11v3 meganuclease to cleave 66 'miscognate' DNA target sites (each harboring a single base pair substitution at one of the 22 positions in the target sequence) was measured with the tethered flow cytometric cleavage assay. Activity against each target site is illustrated as a bar graph showing the Ca<sup>2+</sup>/Mg<sup>2+</sup> ratio (magnitude of the drop in A647 signal from the cleaved DNA target substrate) relative to activity against the cognate target site. Activity of the enzyme against the cognate target site is indicated with a horizontal purple line.

**a**

```
eOnuTherm      SINPWILTFADAEGSFLLRIRKNNKSSVGYSTELGFQITLHNKDKSILENIQSTWVGVIANSGDNAVSLKVTRFEDLK
Intrm_1        SINPWILTFADAEGSFLLRIRKNNKSSVGYSTELGFQITLHNKDKSILENIQSTWVGVIANSGDNAVSLKVTRFEDLK
Intrm_2        SINPWILTFADAEGSFLLRIRKNNKSSVGYSTELGFQITLHNKDKSILENIQSTWVGVIANSGDNAVSLKVTRFEDLK
Final          SINPWILTFADAEGSFLLRIRKYSQTRVGYLTELGFQITLHNKDKSILENIQSTWVGVIANSGDNAVSLKVTRFEDLK
*****          .::: ** *****

eOnuTherm      VIIDHFEKYPLITQKYADYMLFKQAFNVNENKEHLTIEIGIKELVRIKAKLNWGLTDELKKAFFEIIISKERSLINKNIPNF
Intrm_1        VIIDHFEKYPLITQKYADYMLFKQAFNVNENKEHLTIEIGIKELVRIKAKLNWGLTDELKKAFFEIIISKERSLINKNIPNF
Intrm_2        VIIDHFEKYPLITQKYADYMLFKQAFNVNENKEHLTIEIGIKELVRIKAKLNWGLTDELKKAFFEIIISKERSLINKNIPNF
Final          VIIDHFEKYPLITQKYADYMLFKQAFNVNENKEHLTIEIGIKELVRIKAKLNWGLTDELKKAFFEIIISKERSLINKNIPNF
*****          *****

                *

eOnuTherm      KWLAGFTSGEGCFFVNLIKSKSLGVQVQLVFSITQHIRDKNLMNSLITYLGCYIKKKNKSEFSWLDFVVTKFSDIRDK
Intrm_1        KWLAGFTSGDGCFFVNLIKSKSLGVQVQLVFSISQHIRDKNLMNSLITYLGCYIKKKNKSEFSWLEFVVTKFSDIRDK
Intrm_2        KWLAGFTSGDGCFFVNLSKKKTKLGVQVKLVFSISQHIRDKNLMNSLITYLGCYIKKKNKSEFSWLEFVVTKFSDIRDK
Final          KWLAGFTSGDGCFFVNLSKKKTKLGVQVKLVFSISQHIRDKNLMNSLITYLGCYIKKKNKSEFSWLEFVVTKFSDIRDK
*****          .***** * .:*****:*****:*****:*****:*****:*****:*****

eOnuTherm      IIPFFQEYTLIGTKLKDFEDWCKVAKLIEKKHLTEEGLDEIKKIKLNMNKGRVF
Intrm_1        IIPFFQEYTLIGTKLKDFEDWCKVAKLIEKKHLTEEGLDEIKKIKLNMNKGRVF
Intrm_2        IIPFFQEYTLIGTKLKDFEDWCKVAKLIEKKHLTEEGLDEIKKIKLNMNKGRVF
Final          IIPFFQEYTLIGTKLKDFEDWCKVAKLIEKKHLTEEGLDEIKKIKLNMNKGRVF
*****          *****
```

3 mutations  
7 mutations  
13 mutations

**b**

**Cognate Target Site Binding**

**Noncognate Target Site Binding**

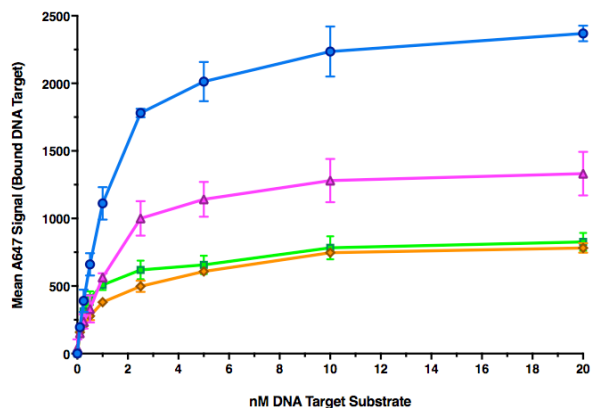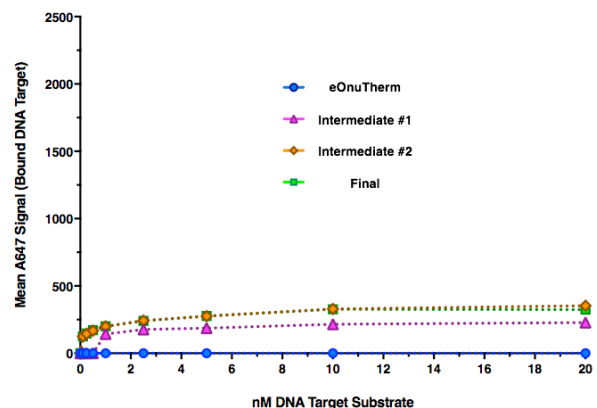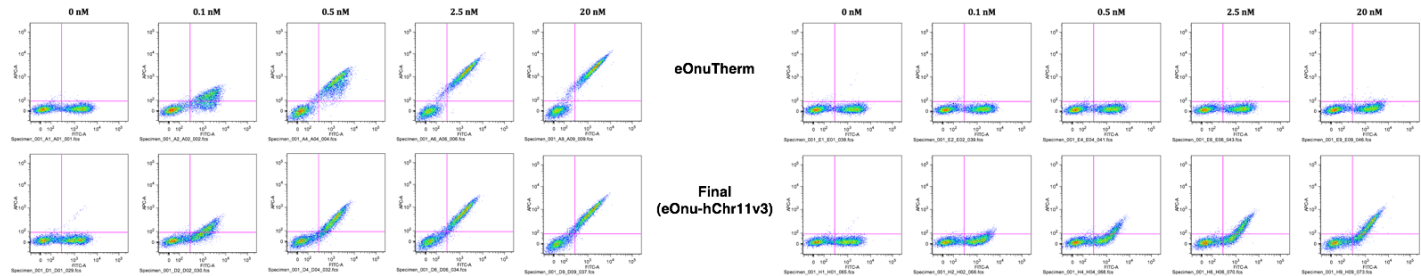

**Supplementary Figure S6; related to Figures 4 and 5. Sequence alignment and DNA binding by the eOnuTherm-hChr11 enzyme series. (a)** Amino acid sequence alignment of the initial engineering scaffold (eOnuTherm), two intermediates along the engineering pathway, and the final eOnuTherm-hChr11v3 meganuclease. The active site glutamic acid altered in the E178D mutant is designated by a red asterisk. **(b) Cognate (specific) and noncognate (nonspecific) DNA binding by a series of engineered enzymes.** Each of the four enzymes along the eOnuTherm-hChr11 engineering pathway were expressed on the yeast surface and incubated with increasing concentrations of labeled DNA target substrates. Binding was assayed against the cognate target site for each enzyme (see **Figures 5 and S7** for target site sequences) as well as a noncognate DNA target (ACTTCAGATGTAGACTGTCACT). **Top:** Binding of the various DNA target substrates over a 0nM-20nM range of concentrations was quantified via flow cytometric analysis. Three replicates of the experiment were collected from separately induced yeast cultures. Error bars represent standard deviation from the mean. **Bottom:** Sample flow cytometric plots are shown for a select number of DNA concentrations (0nM, 0.1nM, 0.5nM, 2.5nM, and 20nM). Spots in the upper right quadrant represent yeast cells with full-length surface expressed meganuclease (anti-Myc-FITC signal) binding the A647-labeled DNA target substrates.



Intermediate #1  
eOnuTherm-hChr11v1

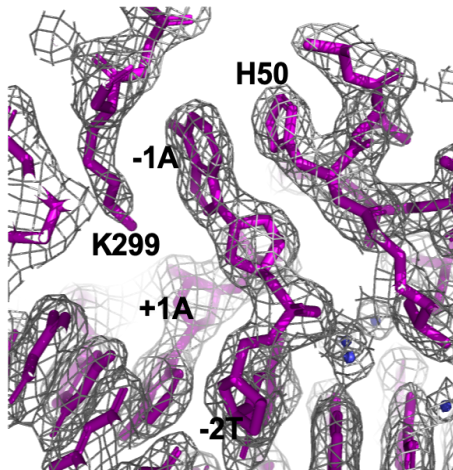

```

-           +
987654321123456789
TTTCCACTTTATTCGACCTTTTA
AAAGGTGAATTAAGCTGGAAAAT

```

Intermediate #2  
eOnuTherm-hChr11v2

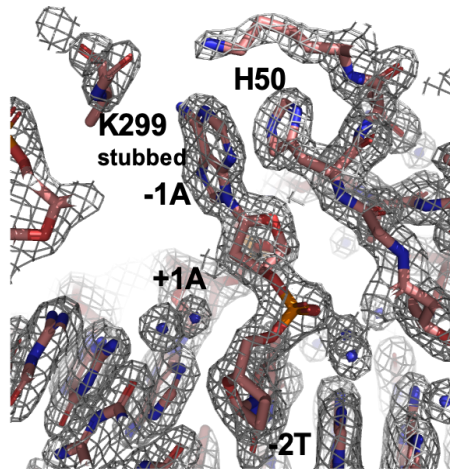

```

-           +
987654321123456789
TTTCCACTTTATTCGACCTCTCA
AAAGGTGAATTAAGCTGGAGAGT

```

Final  
eOnuTherm-hChr11v3

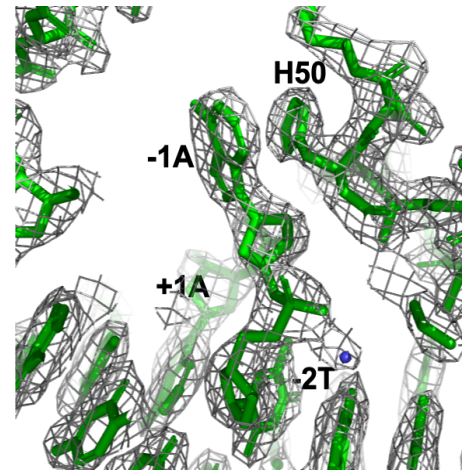

```

-           +
987654321123456789
CCTCCACTTTATTCGACCTCTCA
GGAGGTGAATTAAGCTGGAGAGT

```

WT I-Onul

```

TTTCCACTTTATTCAACCTTTTA
AAAGGTGAATTAAGTTGGAAAAT

```

**Supplementary Figure S7; related to Figure 6. Flipping of Adenine -1.** This structural rearrangement (the largest in the protein-DNA complex relative to the starting scaffold and its bound DNA target) appears to be associated with the initial incorporation of the E178D mutation in the enzyme active site near the center of the DNA target. The flipped base is underlined in each target sequence, and those basepairs that are altered from the wild-type target sequence are highlighted in yellow. The electron density is displayed at a  $1\sigma$  contour level.
